# Supplementary material
Source: PubMed Central journal article supplement (PMC6839961)
Supplement: EMS84767-supplement-eAppendix_1.pdf [file EMS84767-supplement-eAppendix_1.pdf]

## eAppendix 1

### *Quality Ratings- Questions and Scoring Information:*

1. Was the setting of the study clearly described? (e.g., location and relevant dates or length of recruitment/data collection; both reported = 1, only 1 reported/not reported= 0)
2. Were the eligibility criteria clearly specified? (inclusion or exclusion criteria clearly specified = 1, neither specified = 0)
3. What was the sampling method used? (0 = convenience/consecutive/not reported, 1 = random)
4. Was the response rate adequate? (e.g., below 70%/not reported = 0, 70% or higher = 1)
5. Were demographic characteristics of the study population given? (e.g., age, ethnicity, education, marital status, employment, parity; not reported/only one of the above listed = 0, two or more of the above = 1)
6. Was information included about people who completed the study versus those who refused? (e.g., did they differ on any demographic variables? No/not reported = 0, yes =1)
7. Was the time frame of assessment reported or ascertainable? (e.g., past 2 weeks, past month; no = 0, yes = 1).
8. Who administered the diagnostic interview? (trained lay person/not reported = 0, trained clinician/researcher/mental health worker = 1)
9. Were confidence intervals or standard errors presented with the anxiety prevalence estimates? (not reported = 0, reported = 1)
10. Was there a discussion of limitations of the study/potential biases? (0 = no, 1 = yes)

Supplementary Table 1.

*Estimated probability (%) of having 1+, 2+, etc. anxiety disorders and corresponding prediction intervals (in percentages); the probability of having 5+ diagnoses is negligible and therefore these estimates are excluded. Highest density intervals (HDI) are provided in brackets. The lower bound for some prediction intervals are equal to 0 due to rounding but this simply indicates that in some populations any given disorder could be quite rare (< 0.1%).*

| <b>Disorder</b>            | <b>Number of Diagnoses</b> |                  |                  |                  |
|----------------------------|----------------------------|------------------|------------------|------------------|
|                            | <i>1+</i>                  | <i>2+</i>        | <i>3+</i>        | <i>4+</i>        |
| <i>Prevalence</i>          | 20.7 [16.7 to 25.4]        | 5.5 [4.0 to 7.3] | 1.6 [1.0 to 2.4] | 0.5 [0.2 to 0.8] |
| <i>Prediction Interval</i> | [7.5 to 38.8]              | [0.8 to 12.4]    | [0.1 to 4.2]     | [0.0 to 1.4]     |
